# Supplementary material for: Association between Fine Particulate Matter and Oral Cancer among Taiwanese Men
Source: HighWire-hosted journal article supplement (doi:10.1136/jim-2016-000263), 2018-10-09
Supplement: jim-2016-000263pressrelease.pdf.pdf [file jim-2016-000263pressrelease.pdf.pdf]

## JOURNAL OF INVESTIGATIVE MEDICINE

Peer reviewed? Yes

Evidence type: Observational

Subjects: People

### Air pollution may be linked to heightened mouth cancer risk

*High levels of fine particulate matter and to lesser extent, ozone, may be key*

High levels of air pollutants, especially fine particulate matter (PM<sub>2.5</sub>) and to a lesser extent, ozone, may be linked to a heightened risk of developing mouth cancer, suggests the first study of its kind, published online in the ***Journal of Investigative Medicine***.

The number of new cases, and deaths from, mouth cancer is increasing in many parts of the world. Known risk factors include smoking, drinking, human papilloma virus, and in parts of South East Asia, the chewing of betel quid ('paan'), a mix of ingredients wrapped in betel leaf.

Exposure to heavy metals and emissions from petrochemical plants are also thought to be implicated in the development of the disease, while air pollution, especially PM<sub>2.5</sub>, is known to be harmful to respiratory and cardiovascular health.

To find out if air pollutants might have a role in the development of mouth cancer, the researchers mined national cancer, health, insurance, and air quality databases.

They drew on average levels of air pollutants (sulphur dioxide, carbon monoxide, ozone, nitrogen monoxide, nitrogen dioxide, and varying sizes of fine particulate matter), measured in 2009 at 66 air quality monitoring stations across Taiwan.

In 2012-13, they checked the health records of 482,659 men aged 40 and older who had attended preventive health services, and had provided information on smoking/betel quid chewing.

Diagnoses of mouth cancer were then linked to local area readings for air pollutants taken in 2009.

In 2012-13, 1617 cases of mouth cancer were diagnosed among the men. Unsurprisingly, smoking and frequent betel quid chewing were significantly associated with heightened risk of a diagnosis.

But so too were high levels of PM<sub>2.5</sub>. After taking account of potentially influential factors, increasing levels of PM<sub>2.5</sub> were associated with an increasing risk of mouth cancer.

When compared with levels below 26.74 ug/m<sup>3</sup>, those above 40.37 ug/ m<sup>3</sup> were associated with a 43 per cent heightened risk of a mouth cancer diagnosis.

A significant association was also observed for ozone levels below 28.69-30.97 parts per billion.

This is an observational study, and as such, can't establish cause. And there are certain caveats to consider, say the researchers. These include the lack of data on how much PM<sub>2.5</sub> enters the mouth, or on long term exposure to this pollutant.

Nor is it clear how air pollutants might contribute to mouth cancer, they acknowledge, and further research would be needed to delve further into this.

But some of the components of PM<sub>2.5</sub> include heavy metals, as well as compounds such as polycyclic aromatic hydrocarbons—known cancer causing agents—they say.

And the smaller diameter, but larger surface area, of PM<sub>2.5</sub> means that it can be relatively easily absorbed while at the same time potentially wreaking greater havoc on the body, they suggest.

"This study, with a large sample size, is the first to associate oral cancer with PM<sub>2.5</sub>...These findings add to the growing evidence on the adverse effects of PM<sub>2.5</sub> on human health," they conclude.
